# Supplementary material for: Dietary Nucleotides Supplementation and Liver Injury in Alcohol-Treated Rats: A Metabolomics Investigation
Source: PubMed Central journal article supplement (PMC6273469; doi:10.3390/molecules21040435), 2016-03-31
Supplement: molecules-21-00435-s001.pdf [file molecules-21-00435-s001.pdf]

# Supplementary Materials: Dietary Nucleotides Supplementation and Liver Injury in Alcohol-Treated Rats: A Metabolomics Investigation

Xiaxia Cai, Lei Bao, Nan Wang, Meihong Xu, Ruixue Mao and Yong Li

**Table S1.** Waters Acquity UPLC gradient elution program applied for UPLC-Q-TOF-MS analysis.

| Time (min) | Mobile Phase A (vol%) | Mobile Phase B (vol%) |
|------------|-----------------------|-----------------------|
| Initial    | 100                   | 0                     |
| 1          | 100                   | 0                     |
| 5          | 40                    | 60                    |
| 8          | 0                     | 100                   |
| 14         | 0                     | 100                   |
| 16         | 100                   | 0                     |

vol, volume.

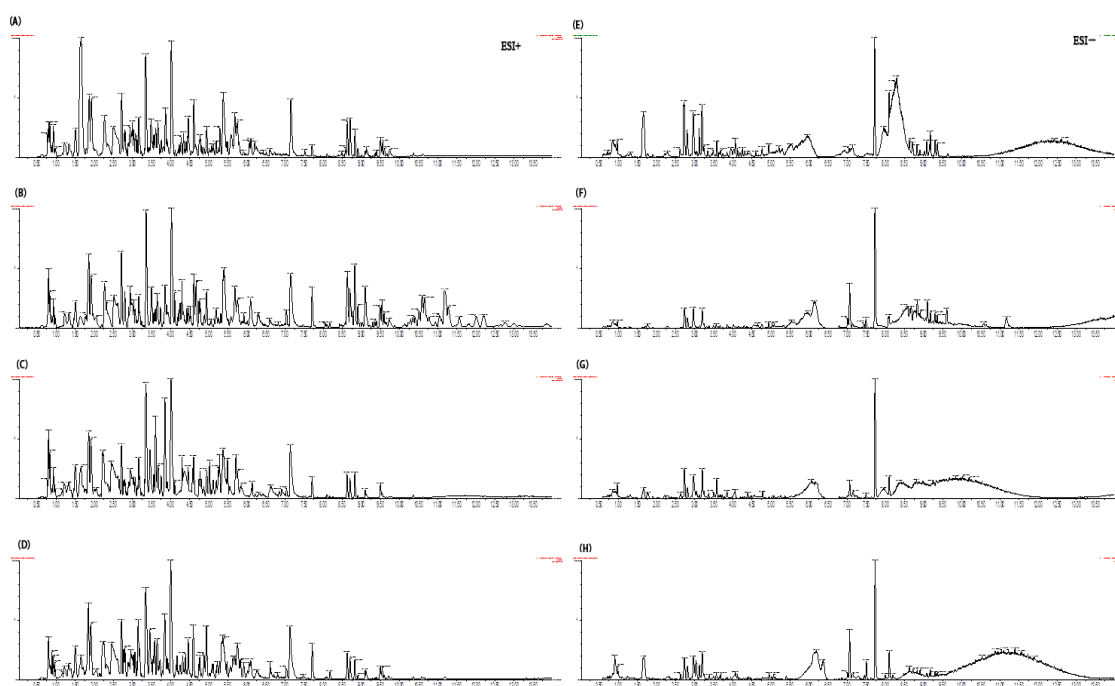

**Figure S1**

**Figure S1.** Base peak intensity (BPI) chromatograms obtained from the liver samples of rats. BPI chromatograms from (A) dextrose control group, (B) alcohol control group; (C) 0.04%NTs group and (D) 0.16%NTs group with positive ion mode; BPI chromatograms from (E) dextrose control group; (F) alcohol control group; (G) 0.04%NTs group and (H) 0.16%NTs group with negative ion mode.
